# Supplementary material for: Lifetime Weight Course as a Phenotypic Marker of Severity and Therapeutic Response in Patients with Eating Disorders
Source: MDPI journal article supplement (doi:10.3390/nu13062034), 2021-06-13
Supplement: s1 [file s1]

**Figure S1.** (supplementary material). Flow-chart with the sampling procedure. Note. AN: anorexia nervosa. BN: bulimia nervosa. BED: binge eating disorder. OSFED: other specified feeding or eating disorder.

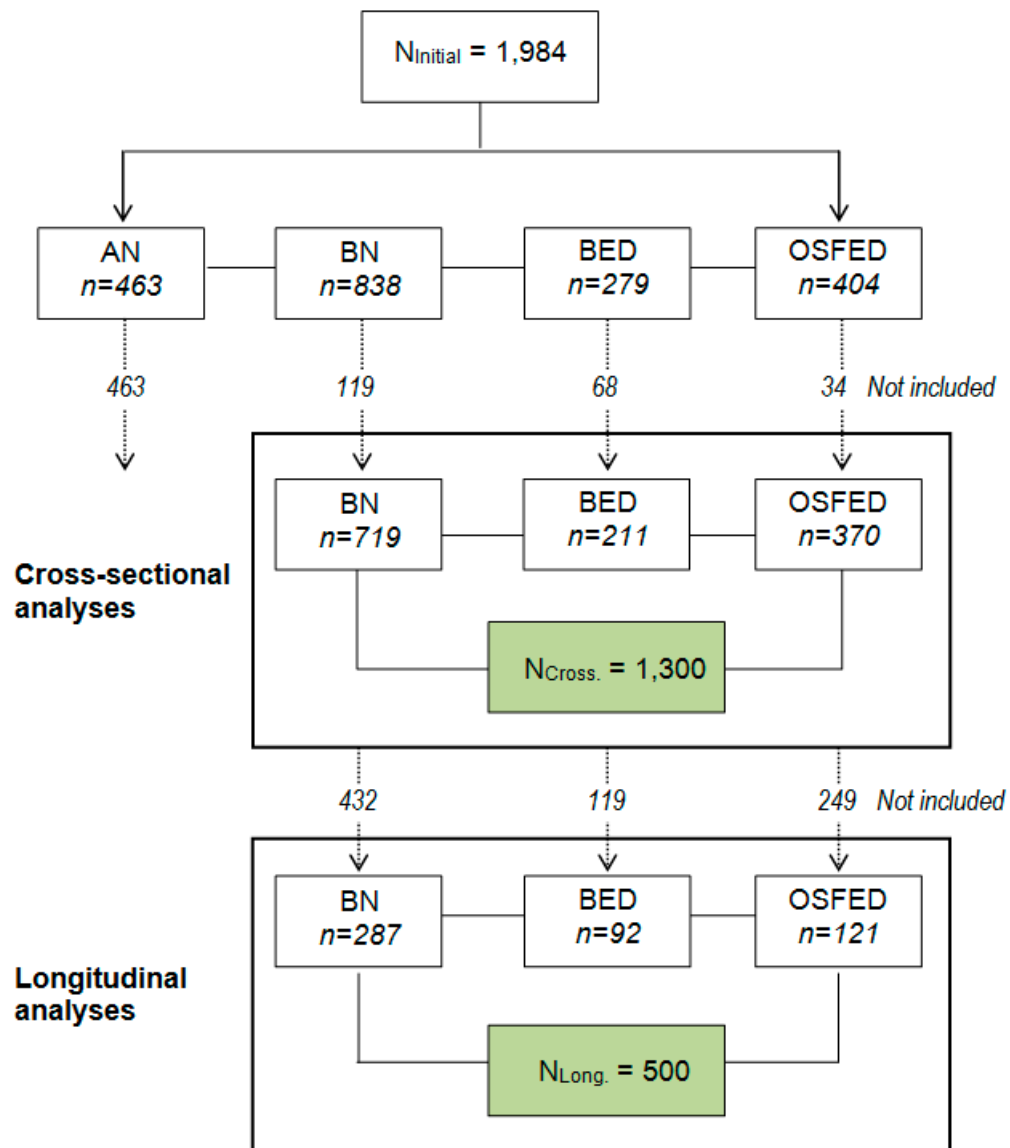

**Table S1.** Comparison between the groups included and not included in the substudy 2 of treatment outcomes.

|                 |                    | Excluded<br>n=800 |       | Participants<br>n=500 |       | p            | h    |
|-----------------|--------------------|-------------------|-------|-----------------------|-------|--------------|------|
|                 |                    | n                 | %     | n                     | %     |              |      |
| BMI group       | Obese-obese        | 45                | 5.6%  | 29                    | 5.8%  | .715         | 0.01 |
|                 | Obese-normo        | 96                | 12.0% | 60                    | 12.0% |              | 0.00 |
|                 | Normo-normo        | 474               | 59.3% | 282                   | 56.4% |              | 0.06 |
|                 | Nomo-obese         | 185               | 23.1% | 129                   | 25.8% |              | 0.06 |
| Diagnosis       | BN                 | 432               | 54.0% | 287                   | 57.4% | <b>.017*</b> | 0.07 |
|                 | BED                | 119               | 14.9% | 92                    | 18.4% |              | 0.09 |
|                 | OSFED              | 249               | 31.1% | 121                   | 24.2% |              | 0.16 |
| Sex             | Female             | 760               | 95.0% | 458                   | 91.6% | <b>.014*</b> | 0.14 |
|                 | Male               | 40                | 5.0%  | 42                    | 8.4%  |              | 0.14 |
| Education level | Primary            | 379               | 47.4% | 202                   | 40.4% | <b>.023*</b> | 0.14 |
|                 | Secondary          | 318               | 39.8% | 213                   | 42.6% |              | 0.06 |
|                 | University         | 103               | 12.9% | 85                    | 17.0% |              | 0.12 |
| Civil status    | Single             | 578               | 72.3% | 354                   | 70.8% | .519         | 0.03 |
|                 | Married/Partner    | 160               | 20.0% | 112                   | 22.4% |              | 0.06 |
|                 | Divorced/separated | 62                | 7.8%  | 34                    | 6.8%  |              | 0.04 |
| Employment      | Unemployed         | 298               | 37.3% | 152                   | 30.4% | <b>.014*</b> | 0.15 |
|                 | Student            | 288               | 36.0% | 182                   | 36.4% |              | 0.01 |
|                 | Employed           | 214               | 26.8% | 166                   | 33.2% |              | 0.14 |
|                 |                    | Mean              | SD    | Mean                  | SD    | p            | d    |
| Age (years-old) |                    | 29.23             | 10.65 | 28.44                 | 9.68  | .177         | 0.08 |
| Onset of ED     |                    | 19.75             | 8.00  | 20.57                 | 8.20  | .075         | 0.10 |
| EDI-2 total     |                    | 104.69            | 40.19 | 105.73                | 41.41 | .653         | 0.03 |
| SCL-90R GSI     |                    | 1.79              | 0.73  | 1.77                  | 0.71  | .600         | 0.03 |

Note. BN: bulimia nervosa. BED: binge eating disorder. OSFED: other specified feeding and eating disorder. SD: standard deviation. \*Bold: significant comparison. <sup>†</sup>Bold: effect size into the mild/moderate ( $|d| > 0.50$  or  $|h| > 0.50$ ) to large/good range ( $|d| > 0.80$  or  $|h| > 0.80$ ).
